# Supplementary material for: Replica exchange molecular dynamics simulation study on the mechanism of desiccation-induced structuralization of an intrinsically disordered peptide as a model of LEA proteins
Source: PubMed Central journal article supplement — Biophys Physicobiol. 2019 Nov 29;16:196–204. doi: 10.2142/biophysico.16.0_196 (PMC6975979; doi:10.2142/biophysico.16.0_196), 2019-11-29
Supplement: 16_196_1.pdf [file 16_196_1.pdf]

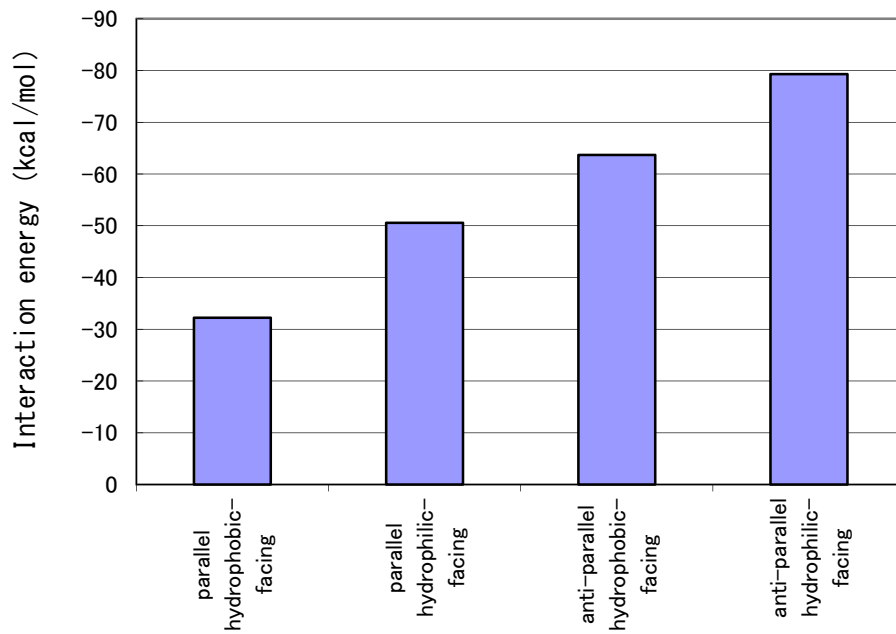

**Supplementary Figure S1.** The interaction energies  $\Delta E$  between two  $\alpha$ -helical chains in the four different arrangements.  $\Delta E$  was obtained by subtracting the energies of the infinitely-separated two chains from that of their complexed state.

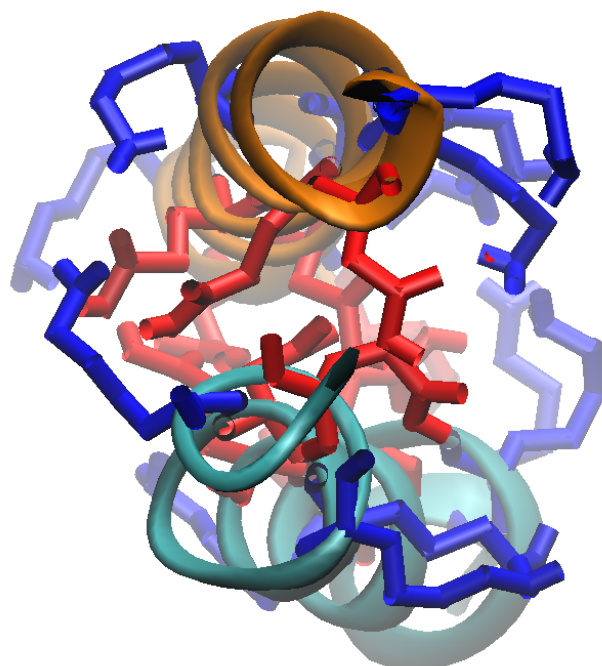

**Supplementary Figure S2.** The structure of the anti-parallel hydrophilic model at the water content of 22.5 wt%. For clarity, water molecules are deleted. The red and blue stick models represent the side chains of acidic (Asp and Glu) and basic (Lys) amino acid residues, respectively.

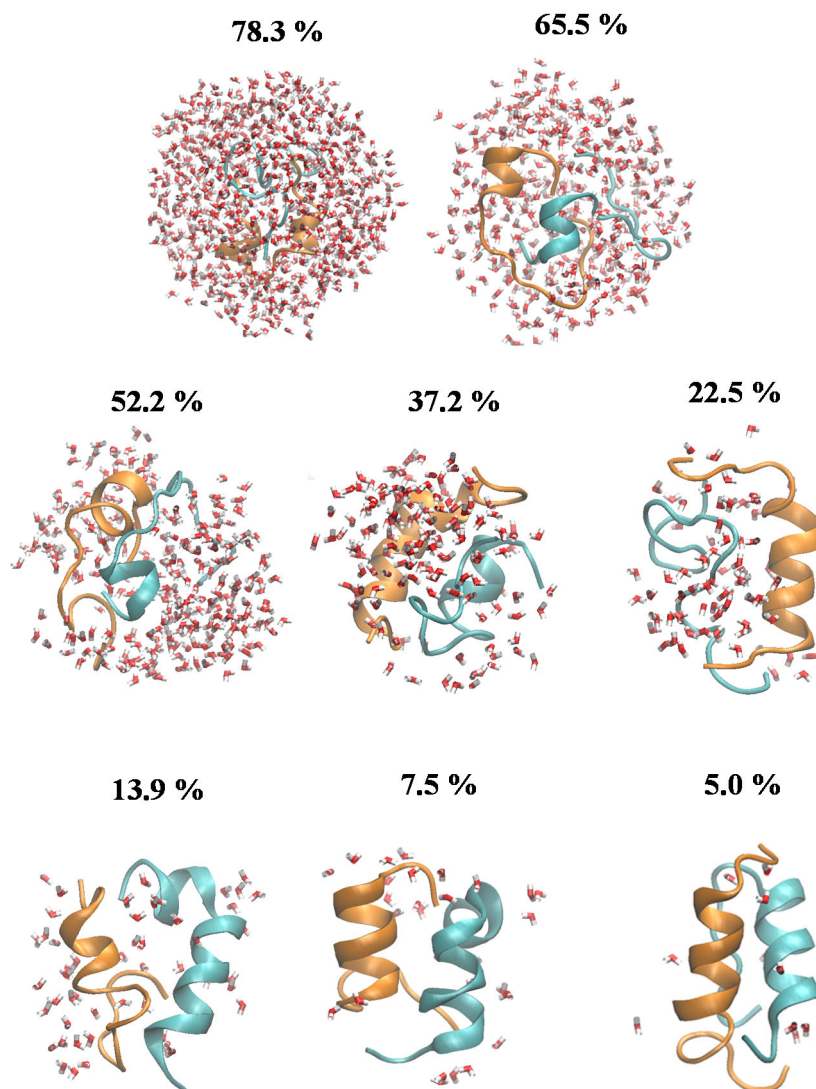

**Supplementary Figure S3.** Representative structure of the anti-parallel hydrophobic-facing model in each water content level (in wt%).

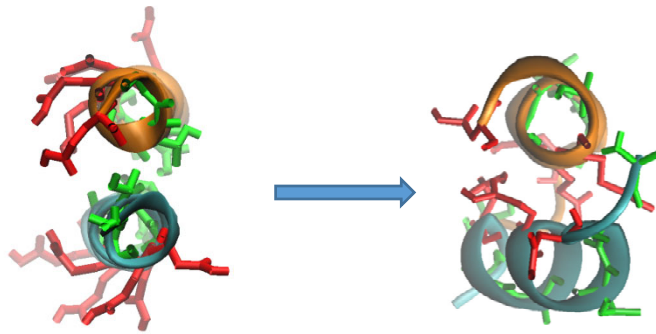

**Supplementary Figure S4.** Structural transition from hydrophobic-facing to hydrophilic-facing, as was observed during the REMD simulation for the antiparallel hydrophobic-facing model. Left: The initial structure where the side chains of the neutral residues (Ala and Thr) are oriented to the interface between the two helices. Right: The post-REMD structure where each helix was rotated about each helical axis to form the hydrophilic-facing structure.

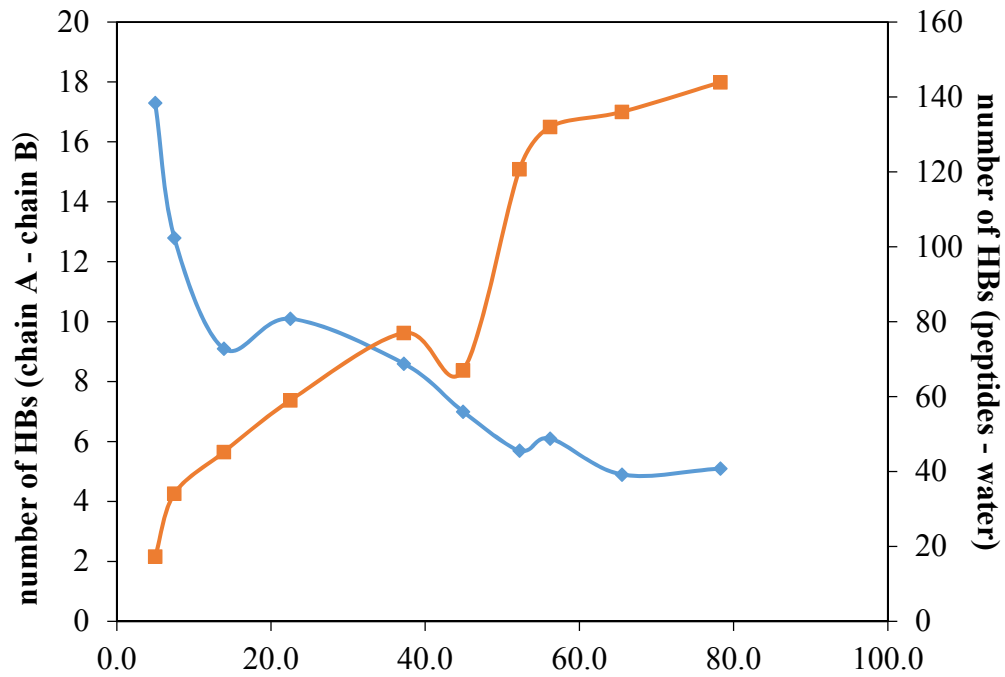

**Supplementary Figure S5.** Water content dependence of the number of interchain hydrogen bonds (blue) and that of the peptide-water hydrogen bonds (red) in the anti-parallel hydrophobic-facing model.

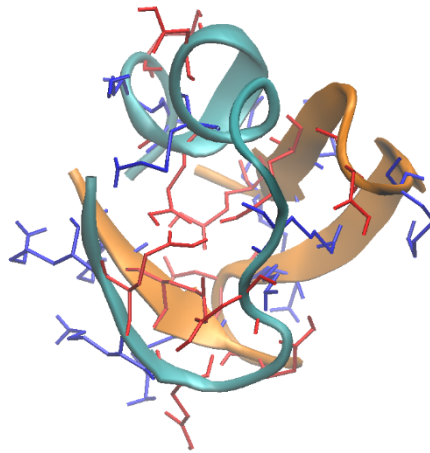

**Supplementary Figure S6.** A representative structure of the anti-parallel model of the scrambled peptide in a water content of 5 wt%. The two chains aggregated where the rate of random coil was more than 40%.

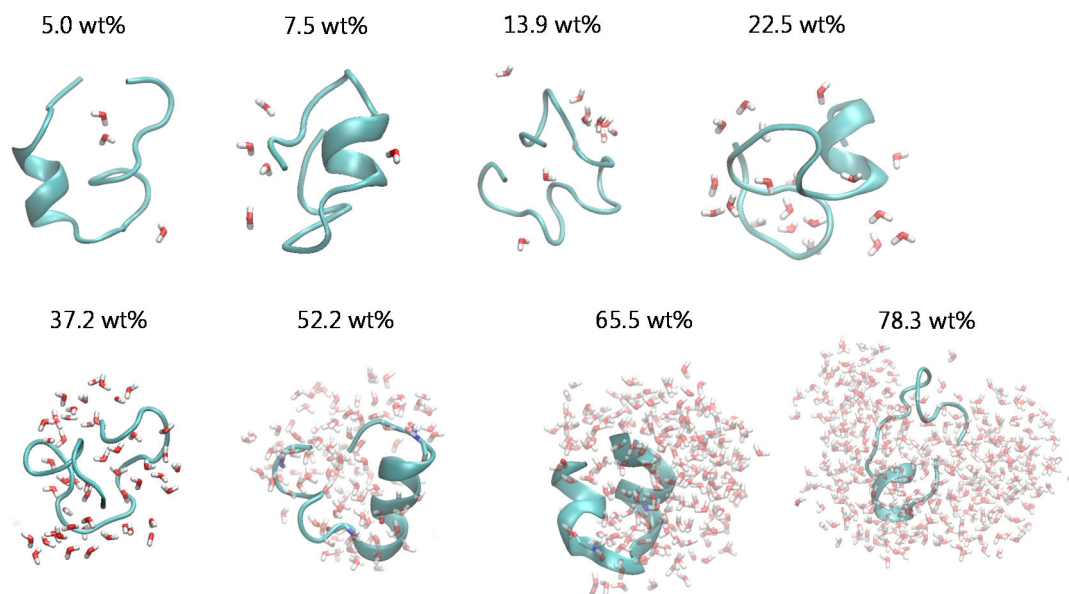

**Supplementary Figure S7.** Representative structures of the single chain of PvLEA-22 at different water content levels.

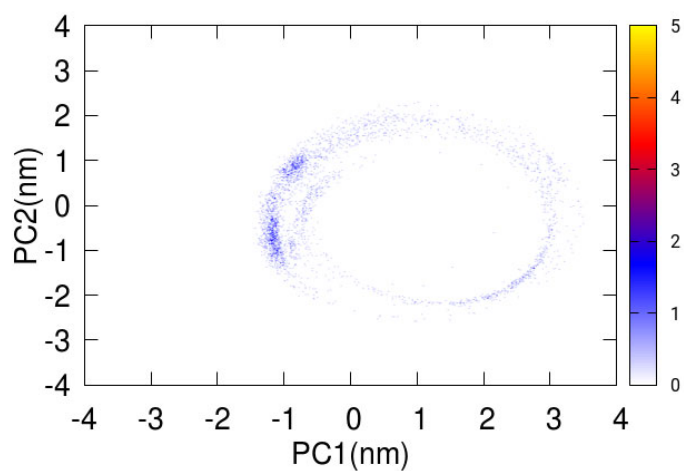

**Supplementary Figure S8.** Free energy maps obtained from the PCA analysis for the single-chain model of PvLEA-22 at the water content level of 5 wt%. The energy values (kJ/mol) are indicated by the color code.



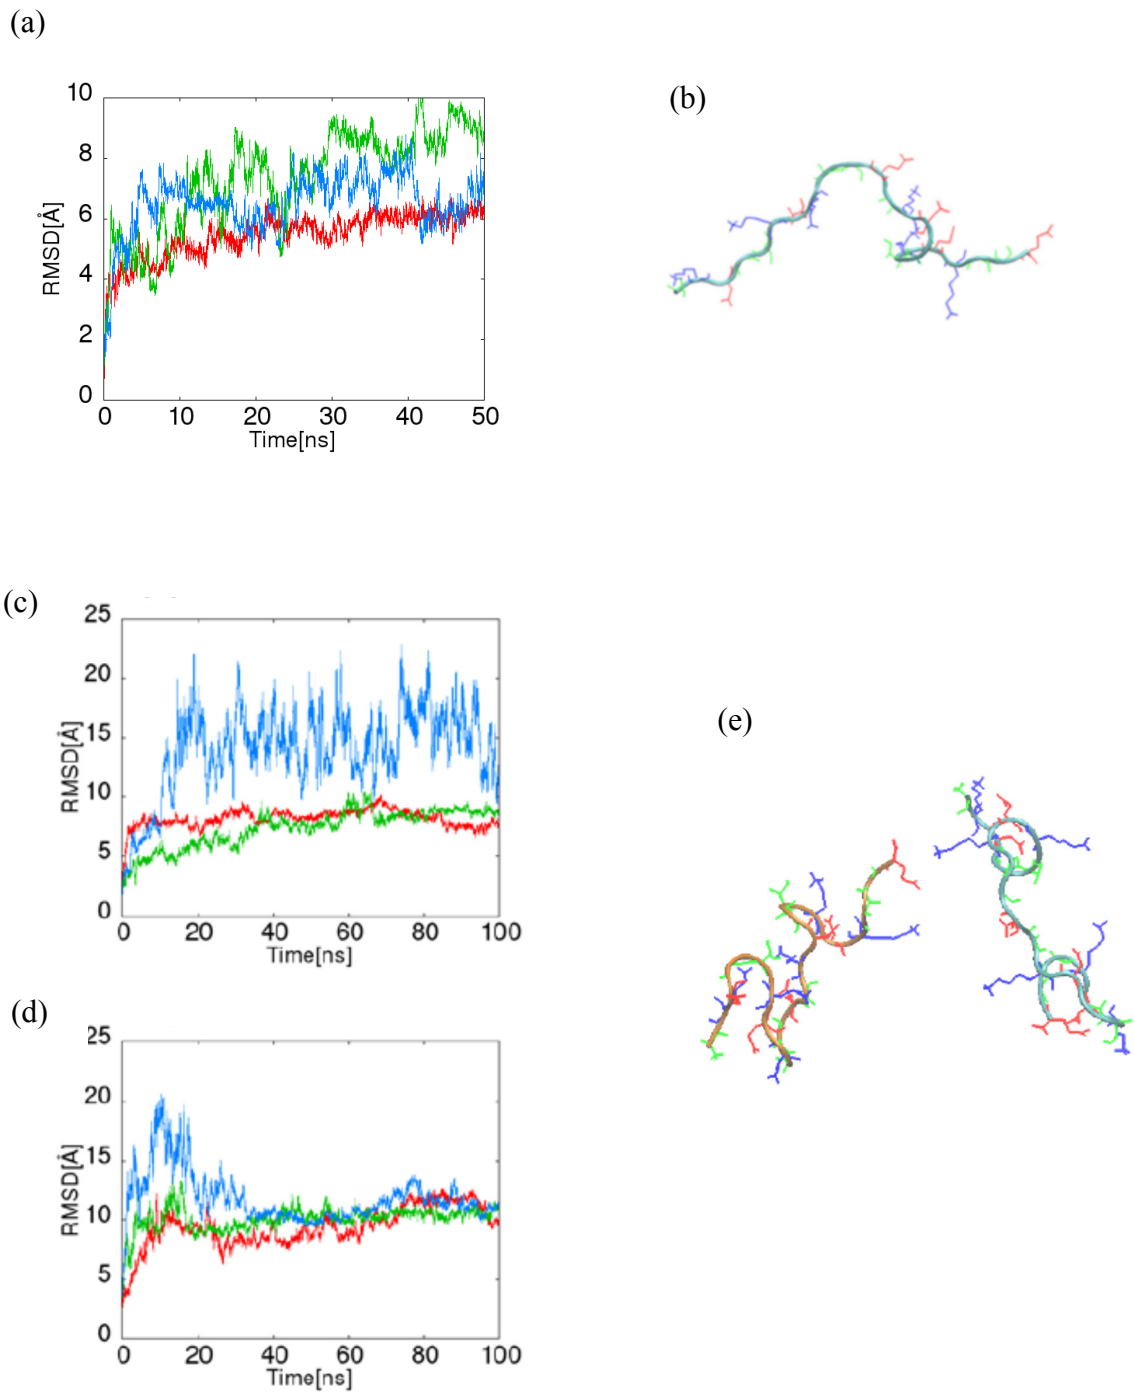

**Supplementary Figure S9.** RMSD results of three conventional MD simulation runs (red, green and blue) for (a) single chain, (c) anti-parallel hydrophobic-facing, and (d) anti-parallel hydrophilic-facing models. (b) and (e) are representative snapshots at 50 ns for (a) and (c), respectively.

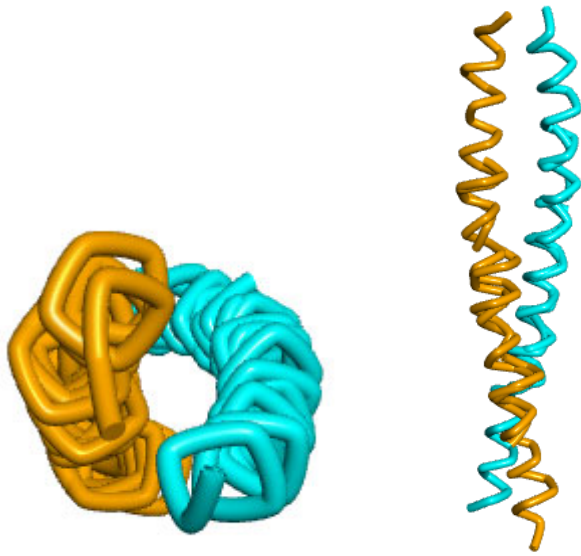

**Supplementary Figure S10.** Coiled coil structure of PvLEA-22. Two sets of the double-bundled  $\alpha$ -helical strands that are shown in Figure 6 were jointed with partial overlap along the helix axis. Left: top view along the helix axis, right: side view.

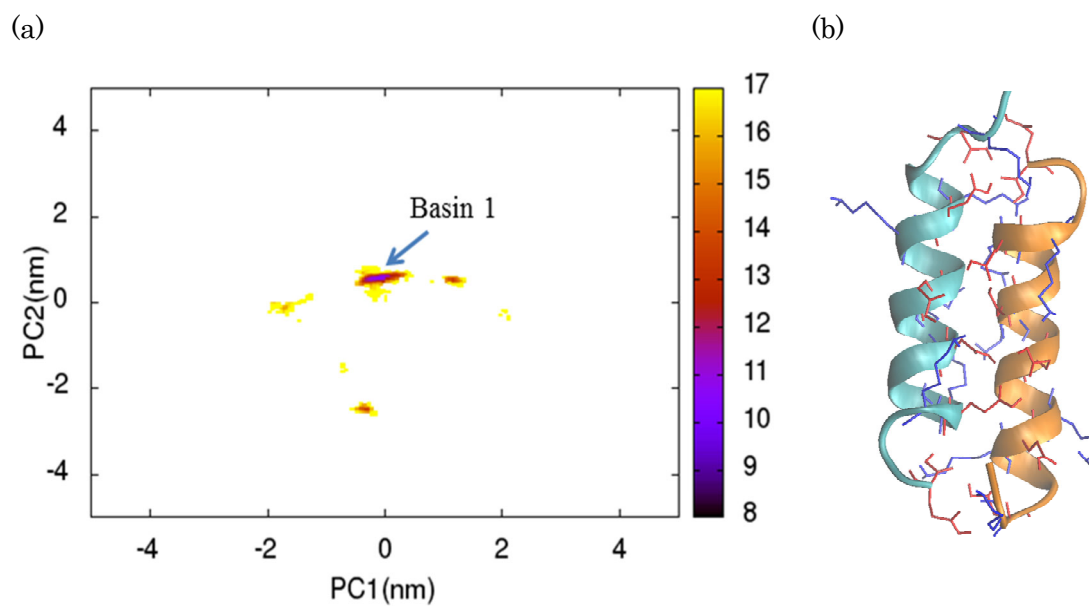

**Supplementary Figure S11.** Analysis of the REMD trajectory at 400 K for the PvLEA-22 solution with a water content of 7.5 wt%. (a) Result of the PCA analysis. (b) A representative snapshot at Basin 1.
